# Supplementary material for: The probability of chromatin to be at the nuclear lamina has no systematic effect on its transcription level in fruit flies
Source: PubMed Central journal article supplement (PMC11071202; doi:10.1186/s13072-024-00528-8), 2024-05-06
Supplement: 13072_2024_528_MOESM1_ESM.pdf [file 13072_2024_528_MOESM1_ESM.pdf]

## RESEARCH

# Supplementary Information: The probability of chromatin to be at the nuclear lamina has no systematic effect on its transcription level in fruit flies

Alexander Y. Afanasyev<sup>1†</sup>, Yoonjin Kim<sup>2†</sup>, Igor S. Tolokh<sup>2†</sup>, Igor V. Sharakhov<sup>3</sup> and Alexey V. Onufriev<sup>2,4,5\*</sup>

\*Correspondence: alexey@cs.vt.edu

<sup>2</sup>Department of Computer Science, Virginia Polytechnic Institute and State University, Blacksburg, VA 24061, USA

<sup>4</sup>Department of Physics, Virginia Polytechnic Institute and State University, Blacksburg, VA 24061, USA

<sup>5</sup>Center for Soft Matter and Biological Physics, Virginia Polytechnic Institute and State University, Blacksburg, VA 24061, USA

Full list of author information is available at the end of the article

<sup>†</sup>These authors contributed equally to this work

## Distributions of TADs in the *Drosophila* nucleus

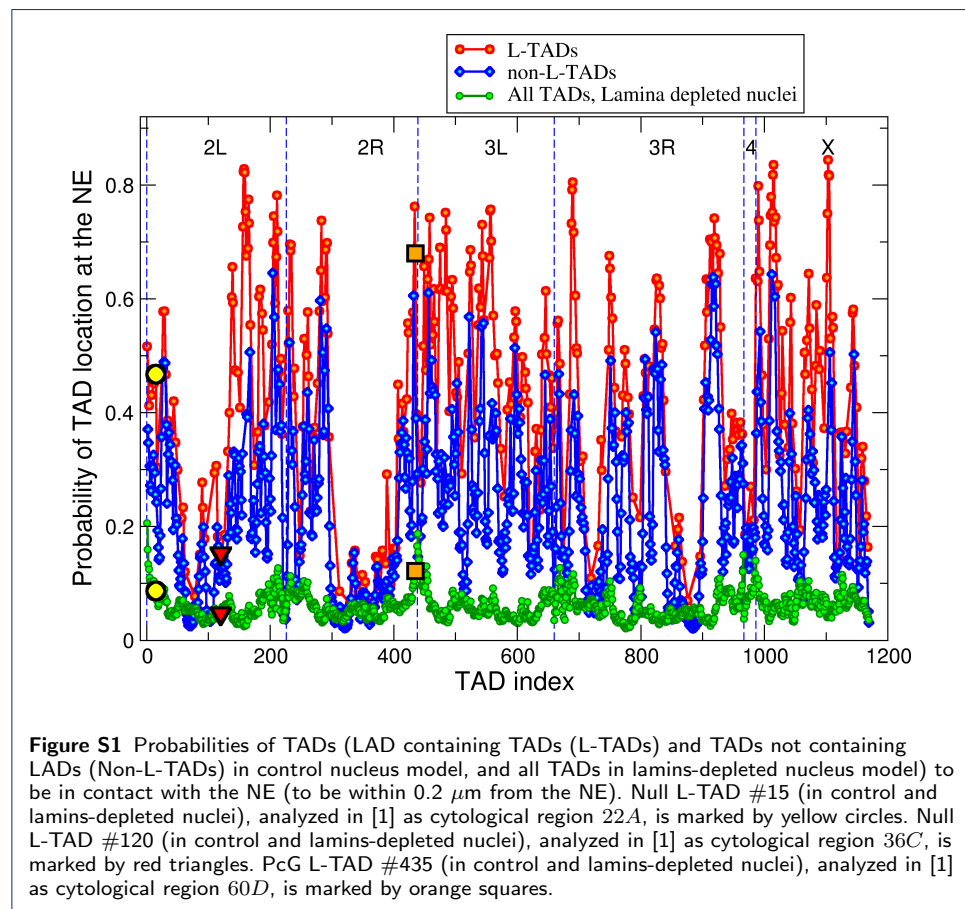

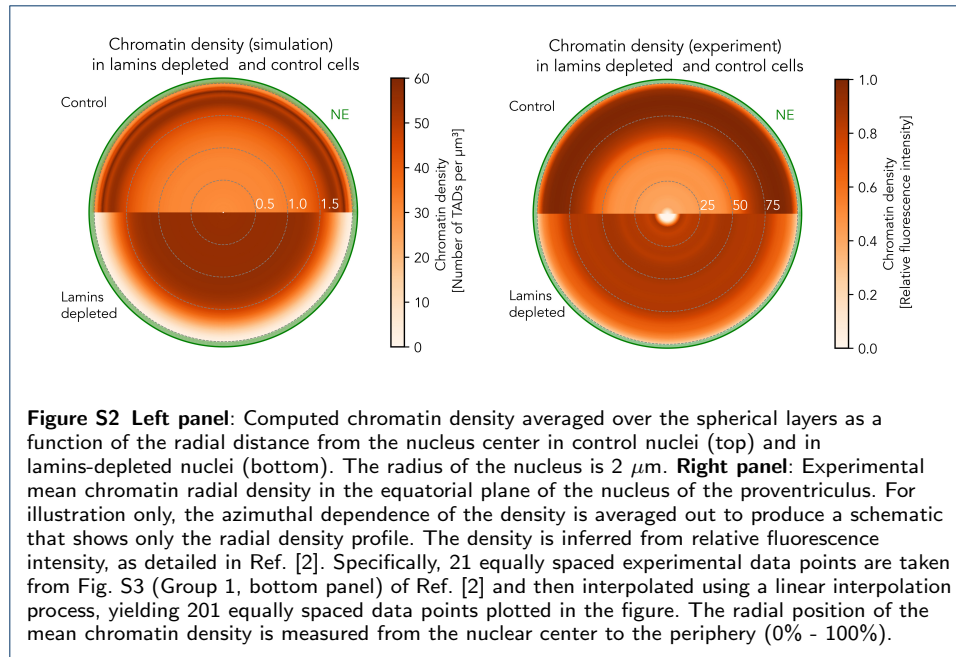

**Table S1** A numerical simulation of gene activity with noise. Here,  $G^C$  and  $G^K$  are uniformly distributed random variables on the interval  $[0,1]$ . A total of  $2N = 2000$  random numbers were generated for each trial, and ratios of two sequential random numbers were computed and averaged over all  $N$  pairs. Each trial starts with an independent seed to initiate the random number generator `Math.random()`, as implemented in Java 1.16.4.

| trial #                   | 1    | 2    | 3    | 4    | 5    |
|---------------------------|------|------|------|------|------|
| $\langle G^C/G^K \rangle$ | 4.45 | 3.64 | 6.40 | 6.68 | 2.82 |

### Comparing averages and ratios of gene expression levels

We argue here that, counter-intuitively, the use of ratios of gene expression levels to characterize possible differences in transcription activities between two sets of genes (e.g., knockdown vs. control) can lead to unintended biases due to inherent noise in the data. For the sake of argument, consider a simplified case of two sets  $C$  and  $K$ , of  $N$  genes in each set, each gene having the same inherent transcription level in both sets. Due to the inevitable stochasticity of gene expression, especially relevant at low levels, and because of experimental uncertainty, the actual measurement of each gene activity will be a random variable  $G_i^C$  (and  $G_i^K$ ) with some distribution, here assumed identical for all genes. For the sake of argument, assume this distribution to be uniform on the gene activity interval from 0 to 1. Obviously, in this case the mean expression level  $\langle G_i \rangle$  of each gene is exactly  $1/2$ , the activity averaged over each gene set  $\langle G^C \rangle = \langle G^K \rangle = \frac{1}{N} \sum_i G_i = 1/2$ . That is if one uses transcription activity averages to compare two sets of genes, their activities are the same, as expected. The situation is different if one attempts to use  $\frac{G_i^C}{G_i^K}$  to make the comparison, e.g. to evaluate the effect of a knockdown. Note that, in general, the average of a ratio does not equal the ratio of the averages; a numerical example is shown in Table S1. The intuitive rationale for the effect is as follows: a deviation of the denominator down from its mean value causes a larger increase of the fraction than does the decrease of the fraction caused by the same size deviation of the denominator up from its mean. Rigorous analysis shows that in the case of the uniform distribution on  $[0, 1]$  interval, the mean of the ratio diverges (logarithmically), which explains the large variation of the mean ratio from one trial ("experiment") to another. Thus, each independent set of measurements can bring about a different outcome in terms of the ratio of the gene activities, Table S1.

### **The key conclusions remain valid to another metric of transcription activity in TADs**

We propose another metric of transcription activity in TADs – RPKMTL (number of Reads mapped to all genes in a TAD per kilobase of TAD length per Million reads mapped to all TADs). Unlike RPKMT, RPKMTL uses the length of a TAD to obtain the average transcription activity at TAD resolution. RPKMTL characterizes an average expression of all genes in a TAD and is defined as:

$$\text{RPKMTL} = \frac{10^6 \times \text{Reads mapped to genes in a TAD}}{\text{Total mapped reads} \times \text{TAD length in kb}} \quad (1)$$

For two replicates (rep1 and rep2) from published RNA-seq data [1], the transcription activity metric, defined in Eq. 1, is calculated as:

$$\text{RPKMTL} = \frac{10^6 \times (\text{Sum of reads of rep1 and rep2 mapped to genes in a TAD})}{(\text{Total mapped reads of rep1 and rep2}) \times \text{TAD length in kb}} \quad (2)$$

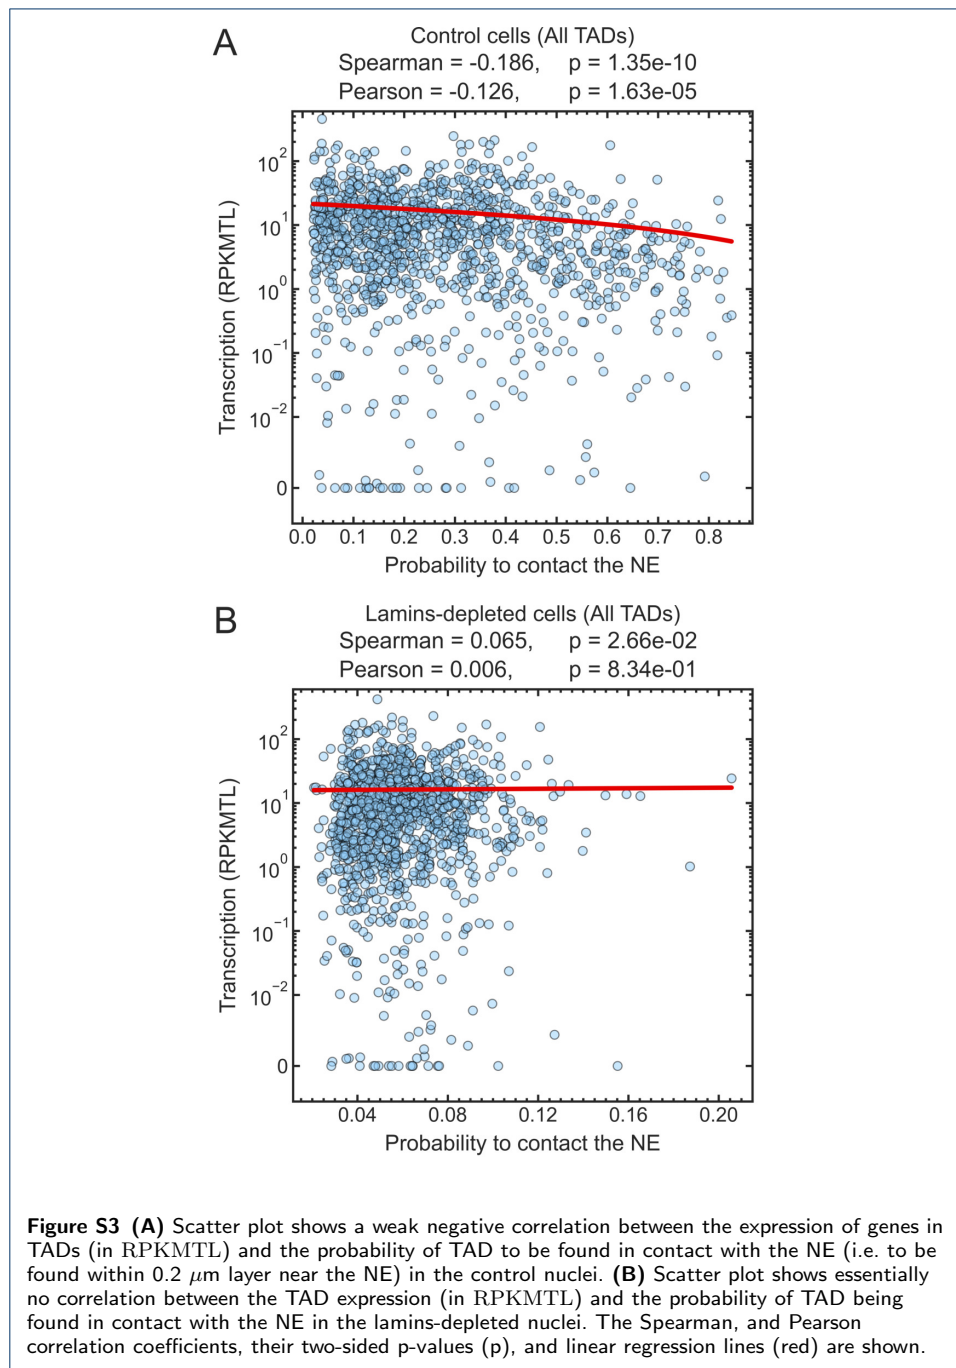

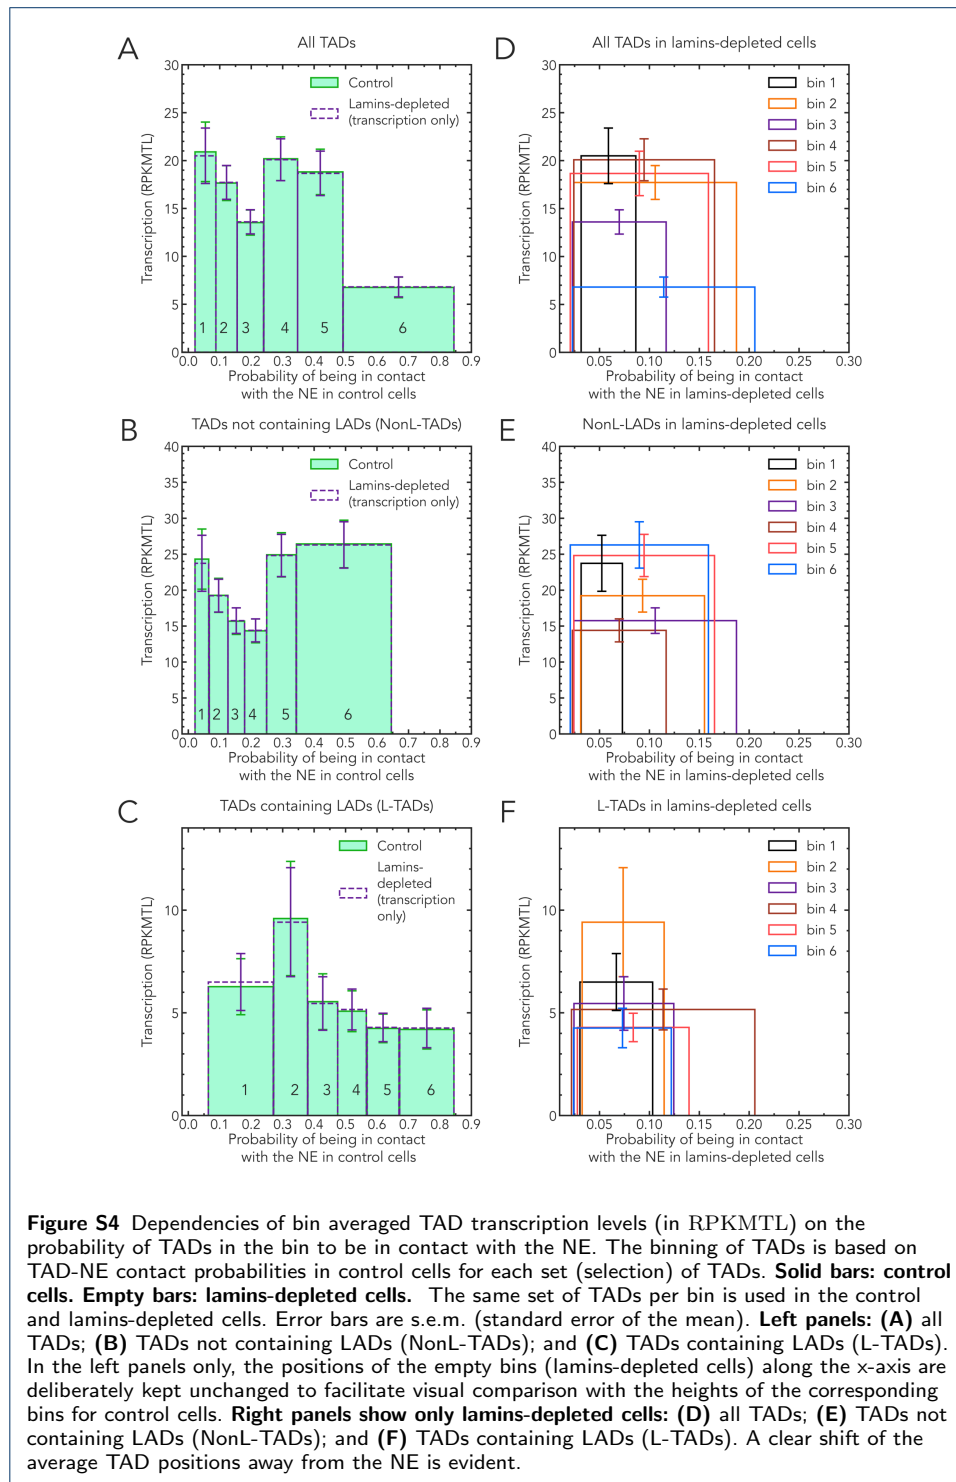

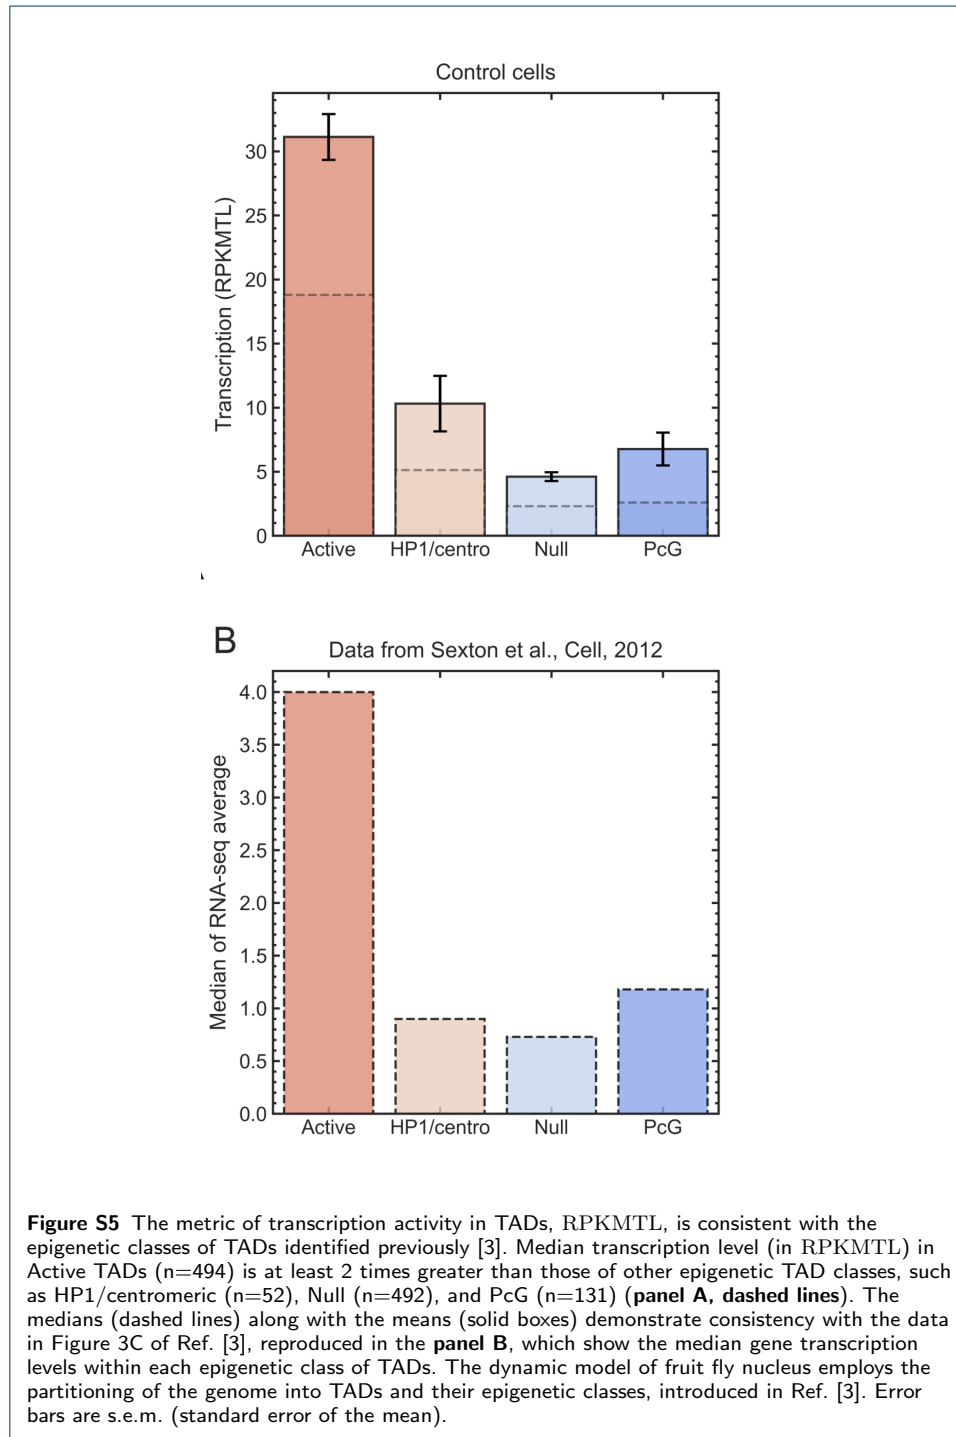

## Distribution of TADs by types and epigenetic classes

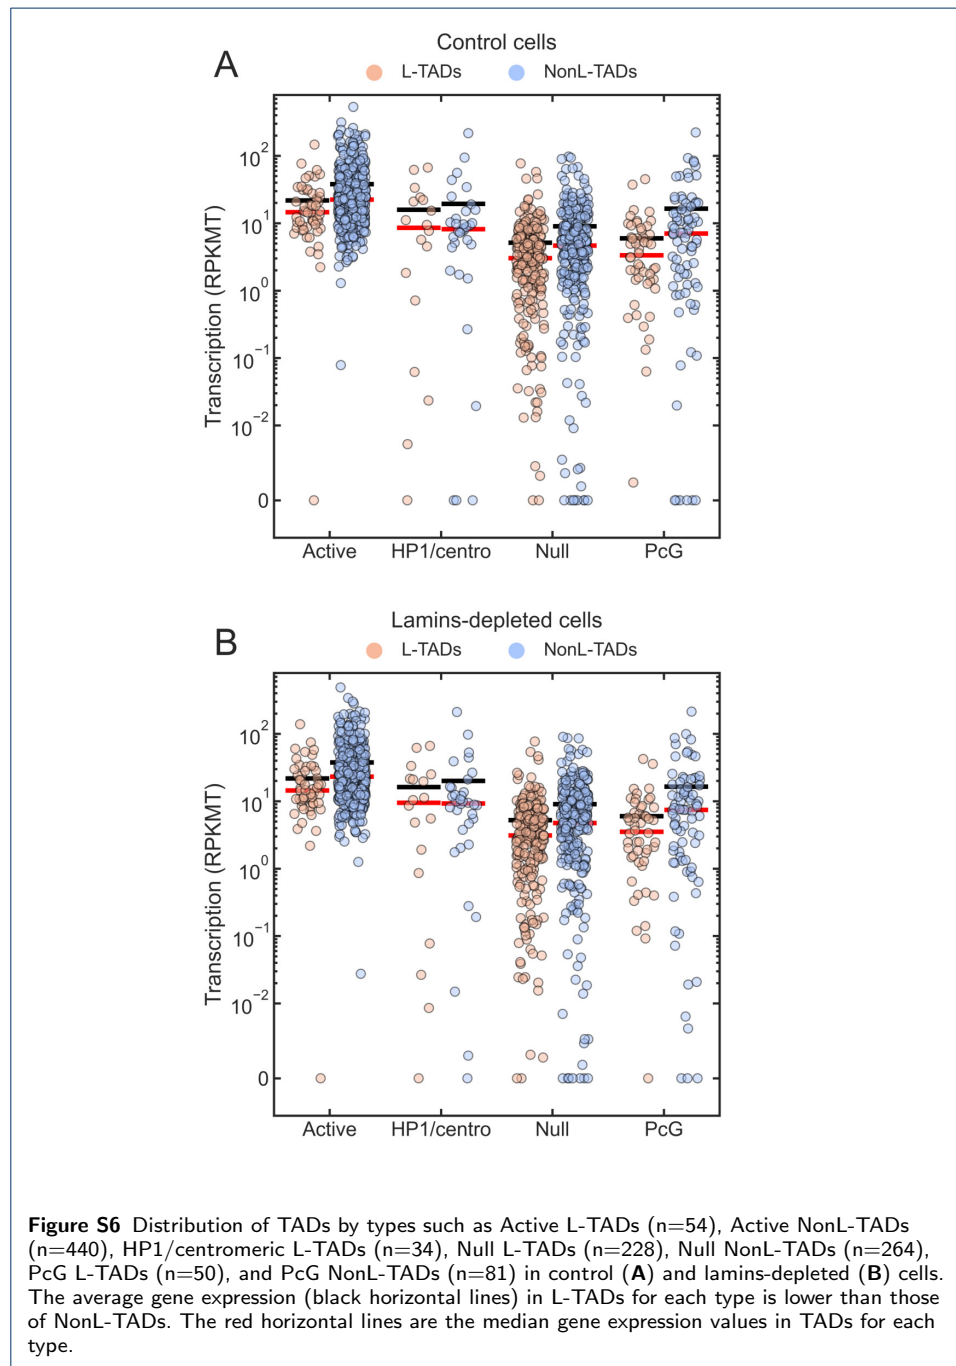



A note on bins #3 and #4 in Figure 3B of the main text.

Below is a possible explanation for why the average transcription levels (in RPKMT) of NonL-TADs in bins #3 and #4 in Figure 3B, corresponding to the 0.15–0.28 probabilities of NonL-TADs to be in contact with the NE, are relatively low. Here, we compared the fractions of different epigenetic classes of TADs in each of the six bins in Figure 3B. Bins #3 and #4 demonstrate a reduced number of Active TADs, which have a much higher average transcription level compared to the other three (non-Active) epigenetic classes of TADs (see Figure 5), and increased fractions of non-Active TADs, see Figure S7E below. In contrast, bin #5 and bin #6 (relatively high average RPKMT levels in Figure 3B) have higher fractions of Active TADs relative to other bins (see Figure S7E).

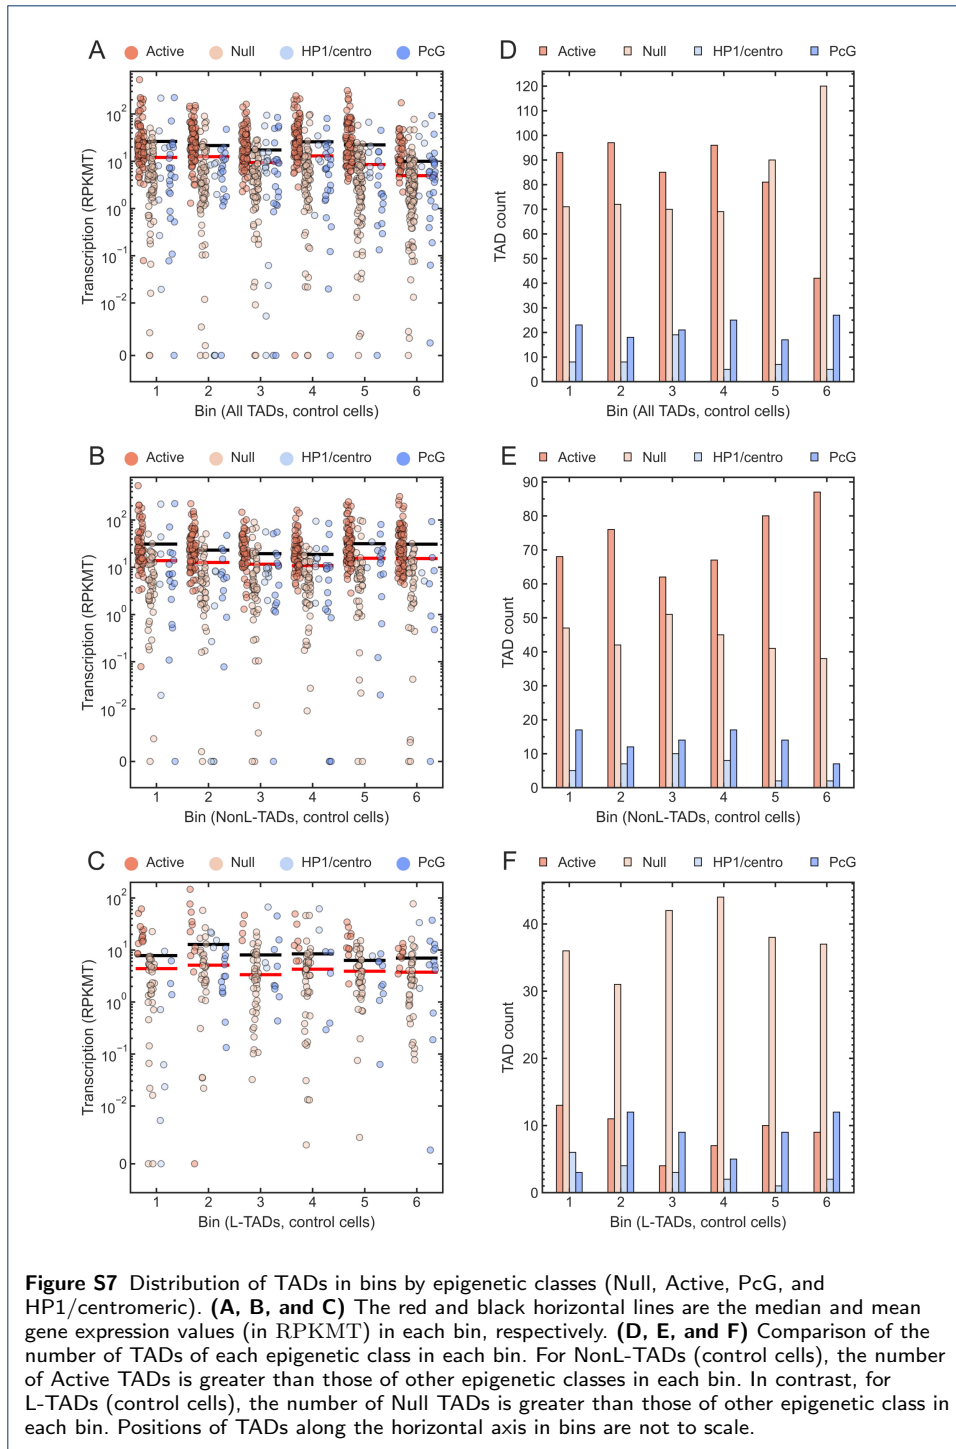

**Acknowledgements**

A.V.O. thanks Andrei Onufriev for implementing and running the numerical example supporting the gene activity ratio analysis.

**Author details**

<sup>1</sup>Department of Biomedical Engineering and Mechanics, Virginia Polytechnic Institute and State University, Blacksburg, VA 24061, USA. <sup>2</sup>Department of Computer Science, Virginia Polytechnic Institute and State University, Blacksburg, VA 24061, USA. <sup>3</sup>Department of Entomology, Virginia Polytechnic Institute and State University, Blacksburg, VA 24061, USA. <sup>4</sup>Department of Physics, Virginia Polytechnic Institute and State University, Blacksburg, VA 24061, USA. <sup>5</sup>Center for Soft Matter and Biological Physics, Virginia Polytechnic Institute and State University, Blacksburg, VA 24061, USA.

**References**

1. Ulianov, S.V., Doronin, S.A., Khrameeva, E.E., Kos, P.I., Luzhin, A.V., Starikov, S.S., Galitsyna, A.A., Nevasheva, V.V., Ilyin, A.A., Flayamer, I.M., Mikhaleva, E.A., Logacheva, M.D., Gelfand, M.S., Chertovich, A.V., Gavrilov, A.A., Razin, S.V., Sheveloyov, Y.Y.: Nuclear lamina integrity is required for proper spatial organization of chromatin in drosophila. *Nat Commun* **10** (2019). doi:10.1038/s41467-019-09185-y
2. Bondarenko, S.M., Sharakhov, I.V.: Reorganization of the nuclear architecture in the drosophila melanogaster lamin b mutant lacking the CaaX box. *Nucleus* **11**(1), 283–298 (2020). doi:10.1080/19491034.2020.1819704
3. Sexton, T., Yaffe, E., Kenigsberg, E., Bantignies, F., Leblanc, B., Hoichman, M., Parrinello, H., Tanay, A., Cavalli, G.: Three-dimensional folding and functional organization principles of the drosophila genome. *Cell* **148**(3), 458–472 (2012). doi:10.1016/j.cell.2012.01.010
